# Supplementary material for: Body Mass Index and Mortality among Korean Elderly in Rural Communities: Kangwha Cohort Study
Source: PubMed Central journal article supplement (PMC4342154; doi:10.1371/journal.pone.0117731), 2015-02-26
Supplement: pone.0117731.s001.pdf [file pone.0117731.s001.pdf]

## **Supplementary Tables and Figures**

### **Body Mass Index and Mortality among Korean Elderly in Rural Communities: Kangwha Cohort Study**

**Seri Hong, Sang-Wook Yi, Jae Woong Sull, Jae-Seok Hong, Sun Ha Jee, Heechoul Ohrr**

3 January, 2015

Correspondence:

Sang-Wook Yi, MD, PhD, Department of Preventive Medicine and Public Health, Catholic Kwandong  
University College of Medicine, Bumil-ro 579, Gangneung, Gangwon-do, 210-701, Republic of Korea; Tel:  
+82-33-649-7468; Fax +82-33-641-1074-mail: [flyhigh@cku.ac.kr](mailto:flyhigh@cku.ac.kr)

**Table A. Number of the participants and deaths (during 1985-2008) by 14 categories of BMI among Korean elderly in Kangwha county**

| BMI<br>kg/m <sup>2</sup> | Men (N=2,636) |                                        | Women (N=3,530) |                                        | Total<br>(N=6,166) |  |
|--------------------------|---------------|----------------------------------------|-----------------|----------------------------------------|--------------------|--|
|                          | n (%)         | No. of<br>death<br>(rate) <sup>a</sup> | n (%)           | No. of<br>death<br>(rate) <sup>a</sup> | n (%)              |  |
| <16                      | 27 (1.0)      | 26 (195.1)                             | 32 (0.9)        | 26 (97.4)                              | 59 (1.0)           |  |
| 16-17                    | 38 (1.4)      | 37 (140.7)                             | 56 (1.6)        | 49 (76.1)                              | 94 (1.5)           |  |
| 17-18.5                  | 179 (6.8)     | 166 (101.1)                            | 226 (6.4)       | 184 (61.9)                             | 405 (6.6)          |  |
| 18.5-20                  | 420 (15.9)    | 371 (82.5)                             | 428 (12.1)      | 324 (53.8)                             | 848 (13.8)         |  |
| 20-21                    | 434 (16.5)    | 366 (67.9)                             | 427 (12.1)      | 303 (47.3)                             | 861 (14.0)         |  |
| 21-22                    | 414 (15.7)    | 329 (58.9)                             | 400 (11.3)      | 253 (39.2)                             | 814 (13.2)         |  |
| 22-23                    | 359 (13.6)    | 274 (54.9)                             | 483 (13.7)      | 318 (40.2)                             | 842 (13.7)         |  |
| 23-24                    | 331 (12.6)    | 259 (54.1)                             | 398 (11.3)      | 249 (38.1)                             | 729 (11.8)         |  |
| 24-25                    | 157 (6.0)     | 123 (58.3)                             | 316 (9.0)       | 205 (40.2)                             | 473 (7.7)          |  |
| 25-26                    | 110 (4.2)     | 87 (57.3)                              | 252 (7.1)       | 138 (30.1)                             | 362 (5.9)          |  |
| 26-27.5                  | 94 (3.6)      | 75 (58.3)                              | 239 (6.8)       | 141 (34.4)                             | 333 (5.4)          |  |
| 27.5-29                  | 50 (1.9)      | 43 (74.0)                              | 146 (4.1)       | 98 (41.7)                              | 196 (3.2)          |  |
| 29-30.5                  | 16 (0.6)      | 13 (66.4)                              | 74 (2.1)        | 48 (40.0)                              | 90 (1.5)           |  |
| ≥30.5                    | 7 (0.3)       | 5 (55.4)                               | 53 (1.5)        | 36 (41.2)                              | 60 (1.0)           |  |

BMI, body mass index.

<sup>a</sup> crude death rate per 1000 person-years

Number of participants with BMI of 30 or above is 10 in men, and 78 in women.

**Table B. Baseline characteristics of in Korean elderly(n=6,166) by the three BMI subgroups**

| Variable                                | Classification            | Men (N=2,636)            |              |            |            | Women(N=3,530) |              |              |            |         |
|-----------------------------------------|---------------------------|--------------------------|--------------|------------|------------|----------------|--------------|--------------|------------|---------|
|                                         |                           | BMI (kg/m <sup>2</sup> ) | <18.5        | 18.5-24.9  | ≥25        | p-value        | <18.5        | 18.5-24.9    | ≥25        | p-value |
|                                         |                           | n (%)                    | n (%)        | n (%)      |            | n (%)          | n (%)        | n (%)        |            |         |
| Age (years)                             | Mean (SD)                 | 68.9 (8.0)               | 66.1 (7.2)   | 65.2 (6.4) | <0.001     | 70.7 (9.0)     | 67.1 (8.5)   | 64.8 (7.3)   | <0.001     |         |
| BMI (kg/m <sup>2</sup> )                | <16                       | 27 (11.1)                | -            | -          |            | 32 (10.2)      | -            | -            |            |         |
|                                         | 16-18.4                   | 217 (88.9)               | -            | -          |            | 282 (89.8)     | -            | -            |            |         |
|                                         | 18.5-20.9                 | -                        | 854 (40.4)   | -          |            | -              | 855 (34.9)   | -            |            |         |
|                                         | 21-22.9                   | -                        | 773 (36.6)   | -          |            | -              | 883 (36.0)   | -            |            |         |
|                                         | 23-24.9                   | -                        | 488 (23.1)   | -          |            | -              | 714 (29.1)   | -            |            |         |
|                                         | 25-27.4                   | -                        | -            | 204 (73.7) |            | -              | -            | 491 (64.3)   |            |         |
|                                         | ≥27.5                     | -                        | -            | 73 (26.4)  |            | -              | -            | 273 (35.7)   |            |         |
|                                         | Hypertension <sup>a</sup> | No                       | 116 (47.5)   | 864 (40.9) | 77 (27.8)  | <0.001         | 150 (47.8)   | 1,036 (42.3) | 265 (34.7) | <0.001  |
| Yes                                     |                           | 128 (52.5)               | 1,251 (59.2) | 200 (72.2) | 164 (52.2) |                | 1,416 (57.8) | 499 (65.3)   |            |         |
| Smoking                                 | Never                     | 29 (11.9)                | 380 (18.0)   | 81 (29.2)  |            | 171 (54.5)     | 1,858 (75.8) | 627 (82.1)   |            |         |
|                                         | Former smoker             | 15 (6.2)                 | 147 (7.0)    | 25 (9.0)   | <0.001     | 6 (1.9)        | 54 (2.2)     | 18 (2.4)     | <0.001     |         |
|                                         | Current smoker            | 200 (82.0)               | 1,588 (75.1) | 171 (61.7) |            | 137 (43.6)     | 540 (22.0)   | 119 (15.6)   |            |         |
| Alcohol intake (drinks/wk)              | None                      | 103 (42.2)               | 743 (35.1)   | 104 (37.6) |            | 282 (89.8)     | 2,201 (89.8) | 694 (90.8)   |            |         |
|                                         | ≤ 0-7(women)/14(men)      | 61 (25.0)                | 526 (24.9)   | 66 (23.8)  | 0.179      | 27 (8.6)       | 215 (8.8)    | 56 (7.3)     | 0.733      |         |
|                                         | > 0-7(women)/14(men)      | 80 (32.8)                | 846 (40.0)   | 107 (38.6) |            | 5 (1.6)        | 36 (1.5)     | 14 (1.8)     |            |         |
| Fruit and vegetable intake <sup>b</sup> | Sufficient                | 10 (4.1)                 | 68 (3.2)     | 9 (3.3)    |            | 10 (3.2)       | 91 (3.7)     | 25 (3.3)     |            |         |
|                                         | Moderate                  | 27 (11.1)                | 330 (15.6)   | 56 (20.2)  | 0.072      | 35 (11.2)      | 348 (14.2)   | 115 (15.1)   | 0.495      |         |
|                                         | Insufficient              | 207 (84.8)               | 1,717 (81.2) | 212 (76.5) |            | 269 (85.7)     | 2,013 (82.1) | 624 (81.7)   |            |         |
| Known chronic disease                   | No                        | 125 (51.2)               | 1,178 (55.7) | 151 (54.5) | 0.403      | 169 (53.8)     | 1,236 (50.4) | 364 (47.6)   | 0.159      |         |
|                                         | Yes                       | 119 (48.8)               | 937 (44.3)   | 126 (45.5) |            | 145 (46.2)     | 1,216 (49.6) | 400 (52.4)   |            |         |

|                               |                           |            |              |            |       |            |              |            |        |
|-------------------------------|---------------------------|------------|--------------|------------|-------|------------|--------------|------------|--------|
| Health insurance <sup>c</sup> | Medicaid                  | 20 (8.2)   | 119 (5.6)    | 7 (2.5)    | 0.017 | 32 (10.2)  | 201 (8.2)    | 39 (5.1)   | 0.005  |
|                               | National Health Insurance | 224 (91.8) | 1,996 (94.4) | 270 (97.5) |       | 282 (89.8) | 2,251 (91.8) | 725 (94.9) |        |
| Occupation                    | Agriculture               | 207 (84.8) | 1,823 (86.2) | 225 (81.2) | 0.082 | 245 (78.0) | 2,015 (82.2) | 578 (75.7) | <0.001 |
|                               | Non-agriculture           | 37 (15.2)  | 292 (13.8)   | 52 (18.8)  |       | 69 (22.0)  | 437 (17.8)   | 186 (24.4) |        |
| Education level               | Ever <sup>d</sup>         | 140 (57.4) | 1,257 (59.4) | 179 (64.6) | 0.183 | 40 (12.7)  | 452 (18.4)   | 190 (24.9) | <0.001 |
|                               | Never                     | 104 (42.6) | 858 (40.6)   | 98 (35.4)  |       | 274 (87.3) | 2,000 (81.6) | 574 (75.1) |        |

<sup>a</sup> Hypertension defined as on regular hypertension medication or systolic blood pressure  $\geq 140$  mm Hg or diastolic blood pressure  $\geq 90$  mm Hg.

<sup>b</sup> Sufficient intake defined as everyday intake of all components of 1 fruit and 2 vegetable categories; Moderate intake defined as nearly-everyday or everyday intake of 1 fruit and at least 1 of 2 vegetable components;

<sup>c</sup> Vast majority of Koreans are insured by National Health Insurance, while Medicaid contributes to health of citizens with a low economic status

<sup>d</sup> Including elementary/middle/high school, village school(*seodang*), university and college

**Table C. Adjusted hazard ratios of mortality according to gender by 4 categories of BMI in Korean elderly during 1985-2008**

| BMI<br>(kg/m <sup>2</sup> )     | Men (N=2,636)                       |                             |                                            |                                     |                             | Women (N=3,530)                            |  |  |  |  |
|---------------------------------|-------------------------------------|-----------------------------|--------------------------------------------|-------------------------------------|-----------------------------|--------------------------------------------|--|--|--|--|
|                                 | No. of<br>death (rate) <sup>a</sup> | Age-adjusted<br>HR (95% CI) | Fully-adjusted <sup>b</sup><br>HR (95% CI) | No. of<br>death (rate) <sup>a</sup> | Age-adjusted<br>HR (95% CI) | Fully-adjusted <sup>b</sup><br>HR (95% CI) |  |  |  |  |
| <b>All-cause mortality</b>      |                                     |                             |                                            |                                     |                             |                                            |  |  |  |  |
| <18.5                           | 229 (112.3)                         | 1.88 (1.63-2.18)            | 1.80 (1.56-2.08)                           | 259 (66.7)                          | 1.42 (1.24-1.62)            | 1.44 (1.25-1.65)                           |  |  |  |  |
| 18.5-20.9                       | 737 (74.5)                          | 1.26 (1.15-1.39)            | 1.24 (1.13-1.37)                           | 627 (50.4)                          | 1.12 (1.02-1.24)            | 1.15 (1.04-1.26)                           |  |  |  |  |
| 21-27.4                         | 1,147 (56.6)                        | 1.00 Reference              | 1.00 Reference                             | 1,304 (37.6)                        | 1.00 Reference              | 1.00 Reference                             |  |  |  |  |
| ≥27.5                           | 61 (70.4)                           | 1.37 (1.06-1.77)            | 1.45 (1.11-1.88)                           | 182 (41.1)                          | 1.20 (1.03-1.40)            | 1.15 (0.98-1.34)                           |  |  |  |  |
| p- for linear trend             |                                     | <0.001                      | <0.001                                     |                                     | <0.001                      | <0.001                                     |  |  |  |  |
| p- for quadratic trend          |                                     | <0.001                      | <0.001                                     |                                     | <0.001                      | <0.001                                     |  |  |  |  |
| <b>Cardiovascular mortality</b> |                                     |                             |                                            |                                     |                             |                                            |  |  |  |  |
| <18.5                           | 35 (17.2)                           | 1.38 (0.96-1.97)            | 1.39 (0.97-2.00)                           | 48 (12.4)                           | 1.13 (0.84-1.54)            | 1.23 (0.90-1.68)                           |  |  |  |  |
| 18.5-20.9                       | 143 (14.5)                          | 1.14 (0.93-1.40)            | 1.17 (0.95-1.44)                           | 139 (11.2)                          | 1.03 (0.85-1.26)            | 1.08 (0.89-1.32)                           |  |  |  |  |
| 21-27.4                         | 253 (12.5)                          | 1.00 Reference              | 1.00 Reference                             | 341 (9.8)                           | 1.00 Reference              | 1.00 Reference                             |  |  |  |  |
| ≥27.5                           | 20 (23.1)                           | 2.07 (1.16-2.93)            | 1.84 (1.16-2.93)                           | 54 (12.2)                           | 1.33 (1.00-1.77)            | 1.19 (0.89-1.59)                           |  |  |  |  |
| p- for linear trend             |                                     | 0.436                       | 0.252                                      |                                     | 0.754                       | 0.517                                      |  |  |  |  |
| p- for quadratic trend          |                                     | 0.008                       | 0.026                                      |                                     | 0.065                       | 0.138                                      |  |  |  |  |
| <b>Respiratory mortality</b>    |                                     |                             |                                            |                                     |                             |                                            |  |  |  |  |
| <18.5                           | 19 (9.3)                            | 4.76 (2.82-8.05)            | 4.15 (2.43-7.10)                           | 11 (2.8)                            | 2.36 (1.20-4.62)            | 2.44 (1.23-4.85)                           |  |  |  |  |
| 18.5-20.9                       | 54 (5.5)                            | 2.19 (1.51-3.19)            | 2.04 (1.39-2.98)                           | 27 (2.2)                            | 1.74 (1.06-2.85)            | 1.84 (1.12-3.03)                           |  |  |  |  |

|                         |            |        |             |        |             |           |       |             |        |             |
|-------------------------|------------|--------|-------------|--------|-------------|-----------|-------|-------------|--------|-------------|
| 21-27.4                 | 56 (2.8)   | 1.00   | Reference   | 1.00   | Reference   | 40 (1.2)  | 1.00  | Reference   | 1.00   | Reference   |
| ≥27.5                   | 1 (1.2)    | 0.51   | (0.07-3.69) | 0.6    | (0.08-4.37) | 3 (0.7)   | 0.64  | (0.20-2.06) | 0.58   | (0.18-1.88) |
| p- for linear trend     |            | <0.001 |             | <0.001 |             |           | 0.001 |             | <0.001 |             |
| p- for quadratic trend  |            | 0.974  |             | 0.929  |             |           | 0.740 |             | 0.605  |             |
| <b>Cancer mortality</b> |            |        |             |        |             |           |       |             |        |             |
| <18.5                   | 31 (15.2)  | 1.40   | (0.96-2.03) | 1.32   | (0.90-1.92) | 24 (6.2)  | 1.63  | (1.05-2.52) | 1.50   | (0.96-2.35) |
| 18.5-20.9               | 141 (14.3) | 1.22   | (0.99-1.50) | 1.16   | (0.94-1.43) | 46 (3.7)  | 0.93  | (0.67-1.30) | 0.90   | (0.65-1.27) |
| 21-27.4                 | 246 (12.1) | 1.00   | Reference   | 1.00   | Reference   | 143 (4.1) | 1.00  | Reference   | 1.00   | Reference   |
| ≥27.5                   | 10 (11.5)  | 1.00   | (0.53-1.88) | 1.18   | (0.62-2.24) | 16 (3.6)  | 0.89  | (0.53-1.49) | 0.90   | (0.54-1.52) |
| p- for linear trend     |            | 0.024  |             | 0.106  |             |           | 0.132 |             | 0.260  |             |
| p- for quadratic trend  |            | 0.856  |             | 0.605  |             |           | 0.278 |             | 0.325  |             |

BMI, body mass index; CI, confidence interval; HR, hazard ratio

<sup>a</sup> crude death rate per 1000 person-years

<sup>b</sup> age at entry(continuous), smoking status (never, former, current smoker), alcohol intake (none, moderate, heavy), fruit and vegetable intake occupation (agriculture, other), education (never, ever), health insurance status (Medicaid, National Health Insurance), known chronic diseases (yes, no), and hypertension (yes, no).

**Table D. Adjusted hazard ratios of mortality according to gender by 7 categories of BMI in Korean elderly during 1990-2008**

| BMI<br>(kg/m <sup>2</sup> ) | Men (N=2,069)                       |                             |                                            |  |                                     | Women (N=3,087)             |                                            |  |  |  |
|-----------------------------|-------------------------------------|-----------------------------|--------------------------------------------|--|-------------------------------------|-----------------------------|--------------------------------------------|--|--|--|
|                             | No. of<br>death (rate) <sup>a</sup> | Age-adjusted<br>HR (95% CI) | Fully-adjusted <sup>b</sup><br>HR (95% CI) |  | No. of<br>death (rate) <sup>a</sup> | Age-adjusted<br>HR (95% CI) | Fully-adjusted <sup>b</sup><br>HR (95% CI) |  |  |  |
| <b>All-cause mortality</b>  |                                     |                             |                                            |  |                                     |                             |                                            |  |  |  |
| <16                         | 11 (223.0)                          | 2.22 (1.21-4.06)            | 2.12 (1.15-3.88)                           |  | 7 (42.0)                            | 0.83 (0.39-1.74)            | 0.83 (0.39-1.76)                           |  |  |  |
| 16-18.4                     | 130 (125.0)                         | 1.85 (1.50-2.27)            | 1.72 (1.40-2.11)                           |  | 182 (77.1)                          | 1.48 (1.24-1.77)            | 1.48 (1.23-1.77)                           |  |  |  |
| 18.5-20.9                   | 516 (82.3)                          | 1.18 (1.03-1.36)            | 1.16 (1.01-1.34)                           |  | 492 (56.9)                          | 1.13 (0.99-1.29)            | 1.13 (0.99-1.30)                           |  |  |  |
| 21-22.9                     | 460 (63.9)                          | 0.95 (0.83-1.1)             | 0.94 (0.82-1.09)                           |  | 479 (46.5)                          | 1.11 (0.97-1.27)            | 1.09 (0.96-1.25)                           |  |  |  |
| 23-24.9                     | 311 (66.2)                          | 1.00 Reference              | 1.00 Reference                             |  | 370 (44.1)                          | 1.00 Reference              | 1.00 Reference                             |  |  |  |
| 25-27.4                     | 133 (70.3)                          | 1.05 (0.86-1.29)            | 1.07 (0.88-1.32)                           |  | 250 (39.3)                          | 0.99 (0.84-1.16)            | 0.96 (0.82-1.13)                           |  |  |  |
| ≥27.5                       | 49 (90.5)                           | 1.45 (1.08-1.97)            | 1.53 (1.12-2.07)                           |  | 155 (49.0)                          | 1.26 (1.04-1.51)            | 1.19 (0.98-1.44)                           |  |  |  |
| p- for linear trend         |                                     | <0.001                      | 0.004                                      |  |                                     | 0.023                       | 0.007                                      |  |  |  |
| p- for quadratic trend      |                                     | <0.001                      | <0.001                                     |  |                                     | 0.002                       | 0.005                                      |  |  |  |

BMI, body mass index; CI, confidence interval; HR, hazard ratio

<sup>a</sup> crude death rate per 1000 person-years

<sup>b</sup> age at entry(continuous), smoking status (never, former, current smoker), alcohol intake (none, moderate, heavy), fruit and vegetable intake occupation (agriculture, other), education (never, ever), health insurance status (Medicaid, National Health Insurance), known chronic diseases (yes, no), and hypertension (yes, no).

**Table E. Adjusted hazard ratios of mortality after excluding people who had known chronic diseases or cancer, according to gender by 7 categories of BMI in Korean elderly during 1985-2008 (Sensitivity analysis)**

| BMI<br>(kg/m <sup>2</sup> ) | Men (N=1,450)          |                     |                             |                                            |  | Women (N=1,761) |                     |                             |                                            |  |
|-----------------------------|------------------------|---------------------|-----------------------------|--------------------------------------------|--|-----------------|---------------------|-----------------------------|--------------------------------------------|--|
|                             | No. of<br>death        | (rate) <sup>a</sup> | Age-adjusted<br>HR (95% CI) | Fully-adjusted <sup>b</sup><br>HR (95% CI) |  | No. of<br>death | (rate) <sup>a</sup> | Age-adjusted<br>HR (95% CI) | Fully-adjusted <sup>b</sup><br>HR (95% CI) |  |
| <b>All-cause mortality</b>  |                        |                     |                             |                                            |  |                 |                     |                             |                                            |  |
| <16                         | 10 (137.5)             |                     | 1.81 (0.96-3.42)            | 1.75 (0.92-3.33)                           |  | 10 (121.7)      |                     | 2.86 (1.52-5.40)            | 3.06 (1.61-5.80)                           |  |
| 16-18.4                     | 106 (99.5)             |                     | 1.69 (1.34-2.13)            | 1.55 (1.22-1.96)                           |  | 126 (59.2)      |                     | 1.40 (1.12-1.75)            | 1.38 (1.10-1.73)                           |  |
| 18.5-20.9                   | 395 (72.8)             |                     | 1.28 (1.09-1.51)            | 1.23 (1.04-1.45)                           |  | 314 (47.3)      |                     | 1.09 (0.92-1.3)             | 1.09 (0.91-1.30)                           |  |
| 21-22.9                     | 338 (56.5)             |                     | 1.01 (0.86-1.20)            | 0.99 (0.83-1.17)                           |  | 266 (36.6)      |                     | 1.08 (0.9-1.29)             | 1.06 (0.88-1.27)                           |  |
| 23-24.9                     | 227 (56.7)             |                     | 1.00 Reference              | 1.00 Reference                             |  | 214 (35.8)      |                     | 1.00 Reference              | 1.00 Reference                             |  |
| 25-27.4                     | 82 (51.7)              |                     | 0.93 (0.72-1.2)             | 0.95 (0.74-1.22)                           |  | 129 (31.1)      |                     | 0.97 (0.78-1.21)            | 0.95 (0.76-1.18)                           |  |
| ≥27.5                       | 34 (65.1)              |                     | 1.28 (0.9-1.84)             | 1.35 (0.94-1.94)                           |  | 81 (38.9)       |                     | 1.32 (1.02-1.71)            | 1.30 (1.00-1.68)                           |  |
|                             | p- for linear trend    |                     | <0.001                      | <0.001                                     |  |                 |                     | 0.075                       | 0.062                                      |  |
|                             | p- for quadratic trend |                     | <0.001                      | <0.001                                     |  |                 |                     | <0.001                      | <0.001                                     |  |

BMI, body mass index; CI, confidence interval; HR, hazard ratio

<sup>a</sup> crude death rate per 1000 person-years

<sup>b</sup> age at entry(continuous), smoking status (never, former, current smoker), drinking frequency (none, moderate, heavy), fruit and vegetable intake occupation (agriculture, other), education (never, ever), health insurance status (medicaid, national health insurance), known chronic diseases (yes, no), and hypertension (yes, no).



**Table F. Adjusted hazard ratios of mortality according to gender by standard 4 categories of BMI in Korean elderly during 1985-2008**

|                                 | Men (N=2,636) |                     |              |             |                             |             | Women (N=3,530) |                     |              |             |                             |             |
|---------------------------------|---------------|---------------------|--------------|-------------|-----------------------------|-------------|-----------------|---------------------|--------------|-------------|-----------------------------|-------------|
|                                 | No. of death  | (rate) <sup>a</sup> | Age Adjusted |             | Fully Adjusted <sup>b</sup> |             | No. of death    | (rate) <sup>a</sup> | Age Adjusted |             | Fully Adjusted <sup>b</sup> |             |
|                                 |               |                     | HR           | (95%CI)     | HR                          | (95%CI)     |                 |                     | HR           | (95%CI)     | HR                          | (95%CI)     |
| <b>All-cause mortality</b>      |               |                     |              |             |                             |             |                 |                     |              |             |                             |             |
| <18.5                           | 229           | (112.3)             | 1.71         | (1.49-1.97) | 1.64                        | (1.43-1.89) | 259             | (66.7)              | 1.34         | (1.17-1.52) | 1.34                        | (1.17-1.53) |
| 18.5-24.9                       | 1,722         | (62.9)              | 1.00         | Reference   | 1.00                        | Reference   | 1,652           | (43.0)              | 1.00         | Reference   | 1.00                        | Reference   |
| 25-29.9                         | 215           | (60.6)              | 1.00         | (0.87-1.16) | 1.04                        | (0.90-1.20) | 409             | (34.5)              | 0.92         | (0.83-1.03) | 0.89                        | (0.80-0.99) |
| ≥30                             | 8             | (65.0)              | 1.23         | (0.61-2.46) | 1.23                        | (0.61-2.47) | 52              | (41.0)              | 1.23         | (0.93-1.62) | 1.21                        | (0.91-1.59) |
| p- for linear trend             |               |                     | <0.001       |             | <0.001                      |             |                 |                     | 0.003        |             | <0.001                      |             |
| p- for quadratic trend          |               |                     | <0.001       |             | <0.001                      |             |                 |                     | <0.001       |             | <0.001                      |             |
| <b>Cardiovascular mortality</b> |               |                     |              |             |                             |             |                 |                     |              |             |                             |             |
| <18.5                           | 35            | (17.2)              | 1.35         | (0.95-1.91) | 1.33                        | (0.94-1.90) | 48              | (12.4)              | 1.10         | (0.82-1.49) | 1.17                        | (0.86-1.59) |
| 18.5-24.9                       | 350           | (12.8)              | 1.00         | Reference   | 1.00                        | Reference   | 404             | (10.5)              | 1.00         | Reference   | 1.00                        | Reference   |
| 25-29.9                         | 64            | (18.0)              | 1.46         | (1.12-1.91) | 1.35                        | (1.03-1.77) | 114             | (9.6)               | 0.99         | (0.80-1.21) | 0.90                        | (0.73-1.11) |
| ≥30                             | 2             | (16.2)              | 1.53         | (0.38-6.14) | 1.23                        | (0.31-4.95) | 16              | (12.6)              | 1.42         | (0.86-2.34) | 1.29                        | (0.78-2.14) |
| p- for linear trend             |               |                     | 0.207        |             | 0.435                       |             |                 |                     | 0.880        |             | 0.421                       |             |
| p- for quadratic trend          |               |                     | 0.010        |             | 0.032                       |             |                 |                     | 0.197        |             | 0.182                       |             |
| <b>Respiratory mortality</b>    |               |                     |              |             |                             |             |                 |                     |              |             |                             |             |

|                         |            |                  |                  |           |                  |                  |
|-------------------------|------------|------------------|------------------|-----------|------------------|------------------|
| <18.5                   | 19 (9.3)   | 3.32 (2.03-5.43) | 2.93 (1.78-4.83) | 11 (2.8)  | 1.65 (0.87-3.14) | 1.67 (0.87-3.21) |
| 18.5-24.9               | 104 (3.8)  | 1.00 Reference   | 1.00 Reference   | 65 (1.7)  | 1.00 Reference   | 1.00 Reference   |
| 25-29.9                 | 6 (1.7)    | 0.45 (0.2-1.03)  | 0.50 (0.22-1.14) | 3 (0.3)   | 0.16 (0.05-0.51) | 0.15 (0.05-0.48) |
| ≥30                     | 1 (8.1)    | 2.62 (0.37-18.8) | 2.93 (0.4-21.34) | 2 (1.6)   | 1.1 (0.27-4.51)  | 0.98 (0.24-4.05) |
| p- for linear trend     |            | <0.001           | <0.001           |           | <0.001           | <0.001           |
| p- for quadratic trend  |            | 0.055            | <0.001           |           | 0.900            | <0.001           |
| <b>Cancer mortality</b> |            |                  |                  |           |                  |                  |
| <18.5                   | 31 (15.2)  | 1.30 (0.90-1.89) | 1.25 (0.86-1.81) | 24 (6.2)  | 1.72 (1.11-2.65) | 1.60 (1.03-2.48) |
| 18.5-24.9               | 350 (12.8) | 1.00 Reference   | 1.00 Reference   | 148 (3.9) | 1.00 Reference   | 1.00 Reference   |
| 25-29.9                 | 46 (13.0)  | 1.02 (0.75-1.38) | 1.10 (0.80-1.50) | 53 (4.5)  | 1.14 (0.83-1.56) | 1.15 (0.84-1.58) |
| ≥30                     | 1 (8.1)    | 0.65 (0.09-4.64) | 0.80 (0.11-5.70) | 4 (3.2)   | 0.81 (0.30-2.20) | 0.83 (0.31-2.26) |
| p- for linear trend     |            | 0.358            | 0.719            |           | 0.336            | 0.482            |
| p- for quadratic trend  |            | 0.389            | 0.304            |           | 0.119            | 0.175            |

BMI, body mass index; CI, confidence interval; HR, hazard ratio

<sup>a</sup> crude death rate per 1000 person-years

<sup>b</sup> age at entry(continuous), smoking status (never, former, current smoker), alcohol intake (none, moderate, heavy), fruit and vegetable intake occupation (agriculture, other), education (never, ever), health insurance status (Medicaid, National Health Insurance), known chronic diseases (yes, no), and hypertension (yes, no).

**Table G. Comparison of adjusted hazard ratios of all-cause mortality according to various categories of BMI by gender in Korean elderly during 1985-2008**

|                                                                                         | Men (N=2,636) |                     |              |             |                             |             | Women (N=3,530) |                     |              |             |                             |             |
|-----------------------------------------------------------------------------------------|---------------|---------------------|--------------|-------------|-----------------------------|-------------|-----------------|---------------------|--------------|-------------|-----------------------------|-------------|
|                                                                                         | No. of death  | (rate) <sup>a</sup> | Age Adjusted |             | Fully Adjusted <sup>b</sup> |             | No. of death    | (rate) <sup>a</sup> | Age Adjusted |             | Fully Adjusted <sup>b</sup> |             |
|                                                                                         |               |                     | HR           | (95%CI)     | HR                          | (95%CI)     |                 |                     | HR           | (95%CI)     | HR                          | (95%CI)     |
| <b>Standard categories for international use</b>                                        |               |                     |              |             |                             |             |                 |                     |              |             |                             |             |
| <18.5                                                                                   | 229           | (112.3)             | 1.71         | (1.49-1.97) | 1.64                        | (1.43-1.89) | 259             | (66.7)              | 1.34         | (1.17-1.52) | 1.34                        | (1.17-1.53) |
| 18.5-24.9                                                                               | 1,722         | (62.9)              | 1.00         | Reference   | 1.00                        | Reference   | 1,652           | (43.0)              | 1.00         | Reference   | 1.00                        | Reference   |
| 25-29.9                                                                                 | 215           | (60.6)              | 1.00         | (0.87-1.16) | 1.04                        | (0.90-1.20) | 409             | (34.5)              | 0.92         | (0.83-1.03) | 0.89                        | (0.80-0.99) |
| ≥30                                                                                     | 8             | (65.0)              | 1.23         | (0.61-2.46) | 1.23                        | (0.61-2.47) | 52              | (41.0)              | 1.23         | (0.93-1.62) | 1.21                        | (0.91-1.59) |
| p- for linear trend                                                                     |               |                     | <0.001       |             | <0.001                      |             |                 |                     | 0.003        |             | <0.001                      |             |
| p- for quadratic trend                                                                  |               |                     | <0.001       |             | <0.001                      |             |                 |                     | <0.001       |             | <0.001                      |             |
| <b>Suggested categories for Asian population by WHO Western Pacific Regional Office</b> |               |                     |              |             |                             |             |                 |                     |              |             |                             |             |
| <18.5                                                                                   | 229           | (112.3)             | 1.65         | (1.44-1.91) | 1.60                        | (1.39-1.85) | 259             | (66.7)              | 1.30         | (1.14-1.49) | 1.31                        | (1.14-1.5)  |
| 18.5-22.9                                                                               | 1340          | (65.5)              | 1.00         | Reference   | 1.00                        | Reference   | 1198            | (44.7)              | 1.00         | Reference   | 1.00                        | Reference   |
| 23-24.9                                                                                 | 382           | (55.4)              | 0.87         | (0.77-0.97) | 0.88                        | (0.79-0.99) | 454             | (39.0)              | 0.92         | (0.82-1.02) | 0.92                        | (0.82-1.02) |
| ≥25                                                                                     | 223           | (60.7)              | 0.98         | (0.85-1.12) | 1.01                        | (0.88-1.17) | 461             | (35.1)              | 0.93         | (0.83-1.03) | 0.89                        | (0.8-0.99)  |
| p- for linear trend                                                                     |               |                     | <0.001       |             | <0.001                      |             |                 |                     | <0.001       |             | <0.001                      |             |
| p- for quadratic trend                                                                  |               |                     | <0.001       |             | <0.001                      |             |                 |                     | 0.003        |             | 0.010                       |             |

**Suggested categories for Korean elderly by the current study**

|                        |              |                  |                  |              |                  |                  |
|------------------------|--------------|------------------|------------------|--------------|------------------|------------------|
| <18.5                  | 229 (112.3)  | 1.88 (1.63-2.18) | 1.80 (1.56-2.08) | 259 (66.7)   | 1.42 (1.24-1.62) | 1.44 (1.25-1.65) |
| 18.5-20.9              | 737 (74.5)   | 1.26 (1.15-1.39) | 1.24 (1.13-1.37) | 627 (50.4)   | 1.12 (1.02-1.24) | 1.15 (1.04-1.26) |
| 21-27.4                | 1,147 (56.6) | 1.00 Reference   | 1.00 Reference   | 1,304 (37.6) | 1.00 Reference   | 1.00 Reference   |
| ≥27.5                  | 61 (70.4)    | 1.37 (1.06-1.77) | 1.45 (1.11-1.88) | 182 (41.1)   | 1.20 (1.03-1.40) | 1.15 (0.98-1.34) |
| p- for linear trend    |              | <0.001           | <0.001           |              | <0.001           | <0.001           |
| p- for quadratic trend |              | <0.001           | <0.001           |              | <0.001           | <0.001           |

#### Categories using BMI of 20-21.9 as reference

|                        |            |                  |                  |            |                  |                  |
|------------------------|------------|------------------|------------------|------------|------------------|------------------|
| <20                    | 600 (91.8) | 1.39 (1.25-1.55) | 1.38 (1.23-1.54) | 583 (58.9) | 1.23 (1.09-1.38) | 1.23 (1.1-1.39)  |
| 20-21.9                | 695 (63.3) | 1.00 Reference   | 1.00 Reference   | 556 (43.2) | 1.00 Reference   | 1.00 Reference   |
| 22-24.9                | 656 (55.2) | 0.89 (0.8-0.99)  | 0.90 (0.81-1.01) | 772 (39.5) | 1.00 (0.89-1.11) | 0.99 (0.88-1.1)  |
| ≥25                    | 223 (60.7) | 1.00 (0.86-1.17) | 1.05 (0.9-1.22)  | 461 (35.1) | 0.97 (0.86-1.1)  | 0.93 (0.82-1.06) |
| p- for linear trend    |            | <0.001           | <0.001           |            | <0.001           | <0.001           |
| p- for quadratic trend |            | <0.001           | <0.001           |            | 0.037            | 0.084            |

BMI, body mass index; CI, confidence interval; HR, hazard ratio

<sup>a</sup> crude death rate per 1000 person-years

<sup>b</sup> age at entry(continuous), smoking status (never, former, current smoker), alcohol intake (none, moderate, heavy), fruit and vegetable intake occupation (agriculture, other), education (never, ever), health insurance status (Medicaid, National Health Insurance), known chronic diseases (yes, no), and hypertension (yes, no).

**Table H. Adjusted hazard ratios of cancer mortality according to gender by 7 categories of BMI in Korean elderly without known history of cancer (Sensitivity analysis).**

|                                                                                                                                                | Men          |                     |              |             |                             |             | Women        |                     |              |             |                             |             |
|------------------------------------------------------------------------------------------------------------------------------------------------|--------------|---------------------|--------------|-------------|-----------------------------|-------------|--------------|---------------------|--------------|-------------|-----------------------------|-------------|
|                                                                                                                                                | No. of death | (rate) <sup>a</sup> | Age Adjusted |             | Fully Adjusted <sup>a</sup> |             | No. of death | (rate) <sup>a</sup> | Age Adjusted |             | Fully Adjusted <sup>a</sup> |             |
|                                                                                                                                                |              |                     | HR           | (95%CI)     | HR                          | (95%CI)     |              |                     | HR           | (95%CI)     | HR                          | (95%CI)     |
| <b>Analysis among participants (2,617 men; 3,504 women) during 1985-2008</b>                                                                   |              |                     |              |             |                             |             |              |                     |              |             |                             |             |
| <16                                                                                                                                            | 3            | (22.5)              | 2.1          | (0.66-6.70) | 1.85                        | (0.58-5.93) | 0            | (0.0)               | 0            | -           | 0                           | -           |
| 16-18.4                                                                                                                                        | 25           | (13.2)              | 1.07         | (0.69-1.67) | 1.01                        | (0.64-1.57) | 22           | (6.1)               | 2.18         | (1.27-3.72) | 2.01                        | (1.17-3.47) |
| 18.5-20.9                                                                                                                                      | 135          | (13.7)              | 1.04         | (0.80-1.35) | 0.98                        | (0.75-1.29) | 45           | (3.6)               | 1.24         | (0.80-1.94) | 1.19                        | (0.76-1.87) |
| 21-22.9                                                                                                                                        | 113          | (10.7)              | 0.77         | (0.59-1.02) | 0.76                        | (0.58-1.00) | 65           | (4.6)               | 1.51         | (1.00-2.28) | 1.48                        | (0.98-2.23) |
| 23-24.9                                                                                                                                        | 94           | (13.7)              | 1.00         | Reference   | 1.00                        | Reference   | 35           | (3.0)               | 1.00         | Reference   | 1.00                        | Reference   |
| 25-27.4                                                                                                                                        | 37           | (13.2)              | 0.96         | (0.66-1.41) | 0.99                        | (0.68-1.45) | 41           | (4.7)               | 1.54         | (0.98-2.42) | 1.52                        | (0.96-2.38) |
| ≥27.5                                                                                                                                          | 10           | (11.5)              | 0.88         | (0.46-1.70) | 1.04                        | (0.54-2.02) | 15           | (3.4)               | 1.15         | (0.63-2.10) | 1.15                        | (0.63-2.11) |
| p- for linear trend                                                                                                                            |              |                     | 0.451        |             | 0.971                       |             |              |                     | 0.329        |             | 0.524                       |             |
| p- for quadratic trend                                                                                                                         |              |                     | 0.124        |             | 0.081                       |             |              |                     | 0.483        |             | 0.618                       |             |
| <b>Analysis among survivors as of January 1990 (2,060 men; 3,067 women) (censoring the first 4.8 years of follow-up data) during 1990-2008</b> |              |                     |              |             |                             |             |              |                     |              |             |                             |             |
| <16                                                                                                                                            | 2            | (40.5)              | 2.98         | (0.72-12.3) | 2.66                        | (0.64-11.0) | 0            | (0.0)               | 0            | -           | 0                           | -           |
| 16-18.4                                                                                                                                        | 15           | (14.4)              | 0.92         | (0.53-1.60) | 0.85                        | (0.49-1.49) | 16           | (6.8)               | 2.00         | (1.09-3.68) | 1.77                        | (0.95-3.29) |

|                        |           |       |             |       |             |          |      |             |      |             |
|------------------------|-----------|-------|-------------|-------|-------------|----------|------|-------------|------|-------------|
| 18.5-20.9              | 90 (14.4) | 0.88  | (0.65-1.19) | 0.83  | (0.61-1.12) | 35 (4.1) | 1.17 | (0.71-1.90) | 1.08 | (0.66-1.77) |
| 21-22.9                | 91 (12.6) | 0.75  | (0.55-1.01) | 0.73  | (0.54-0.99) | 56 (5.5) | 1.53 | (0.98-2.38) | 1.47 | (0.94-2.29) |
| 23-24.9                | 78 (16.7) | 1.00  | Reference   | 1.00  | Reference   | 30 (3.6) | 1.00 | Reference   | 1.00 | Reference   |
| 25-27.4                | 32 (16.9) | 1.01  | (0.67-1.52) | 1.05  | (0.69-1.58) | 35 (5.5) | 1.51 | (0.93-2.47) | 1.48 | (0.91-2.42) |
| ≥27.5                  | 7 (12.9)  | 0.80  | (0.37-1.72) | 0.98  | (0.45-2.14) | 11 (3.5) | 0.99 | (0.49-1.97) | 1.00 | (0.50-2.00) |
| p- for linear trend    |           | 0.617 |             | 0.216 |             | 0.414    |      | 0.750       |      |             |
| p- for quadratic trend |           | 0.312 |             | 0.205 |             | 0.933    |      | 0.867       |      |             |

BMI, body mass index; CI, confidence interval; HR, hazard ratio

<sup>a</sup> crude death rate per 1000 person-years

<sup>b</sup> age at entry(continuous), smoking status (never, former, current smoker), alcohol intake (none, moderate, heavy), fruit and vegetable intake occupation (agriculture, other), education (never, ever), health insurance status (Medicaid, National Health Insurance), known chronic diseases (yes, no), and hypertension (yes, no).

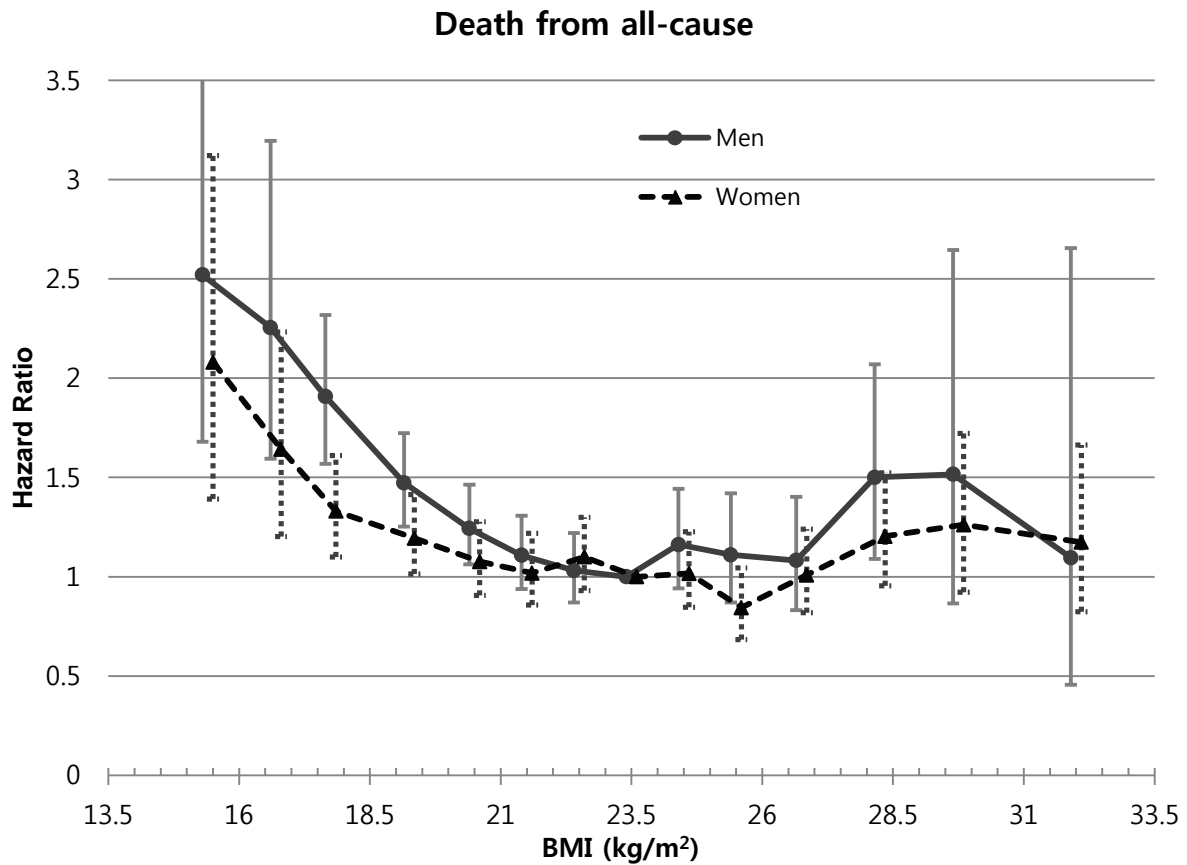

Figure A. Age-adjusted hazard ratio for all-cause mortality according to gender among the Korean elderly during 1985-2008 by 14 categories of body mass index (BMI) (<16, 16-16.9, 17-18.4, 18.5-19.9, 20-20.9, 21-21.9, 22-22.9, 23-23.9 [Reference], 24-24.9, 25-25.9, 26-27.4, 27.5-28.9, 29-30.4, ≥30.5).

The midpoint of each BMI category was used as a representative values of each category, except for the both ends of BMI categories in which median was used as a representative.

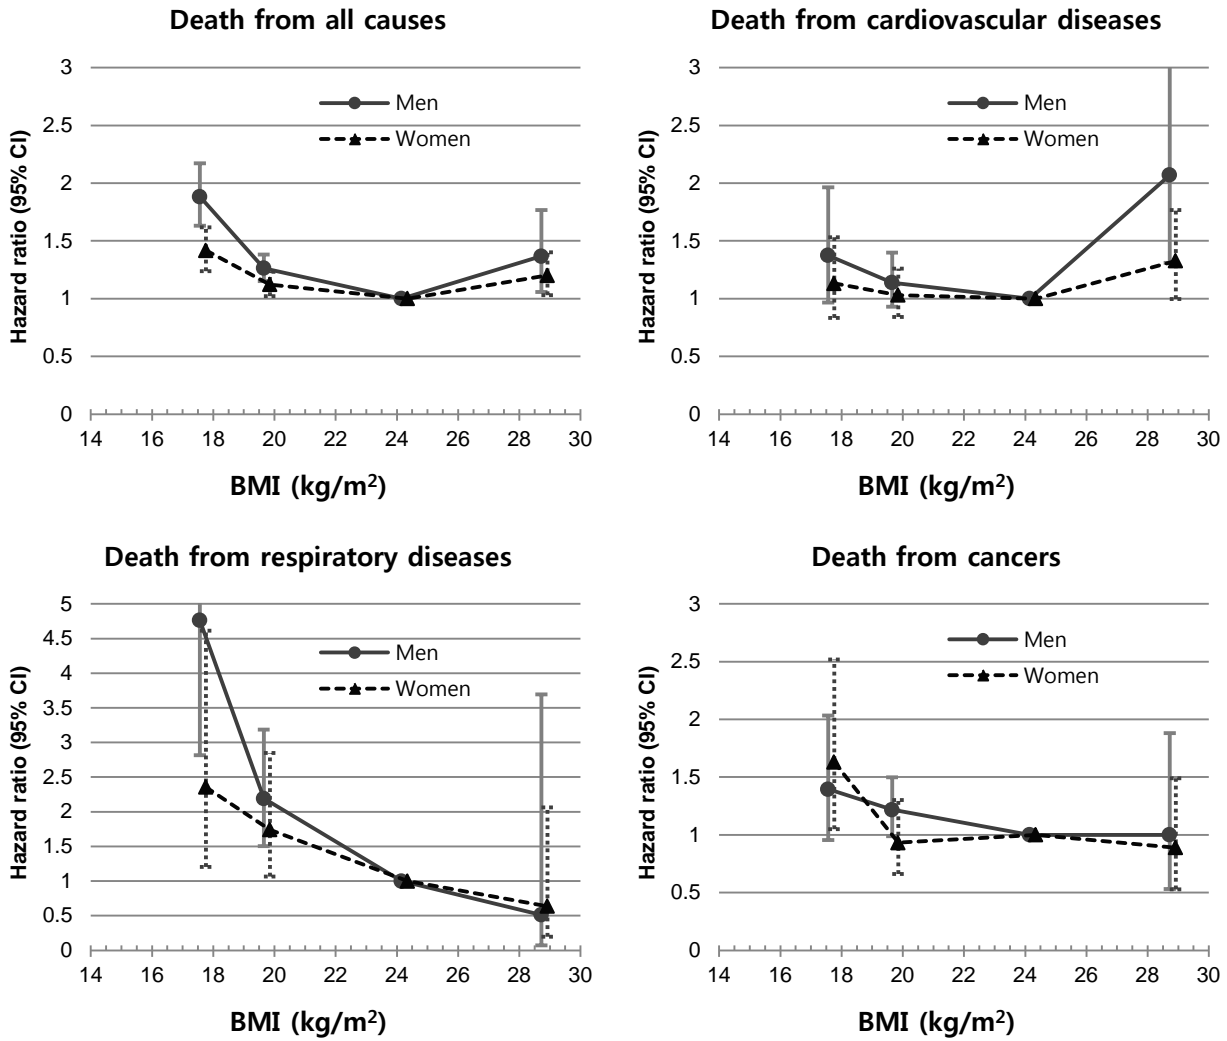

Figure B. Age-adjusted hazard ratio for mortality from various causes according to gender among the Korean elderly during 1985-2008 by 4 categories of body mass index (BMI) (<18.5, 18.5-20.9, 21-27.4 [Reference], ≥27.5). The midpoint of each BMI category was used as a representative value for each category, except for both ends of BMI categories in which the median was used as a representative.



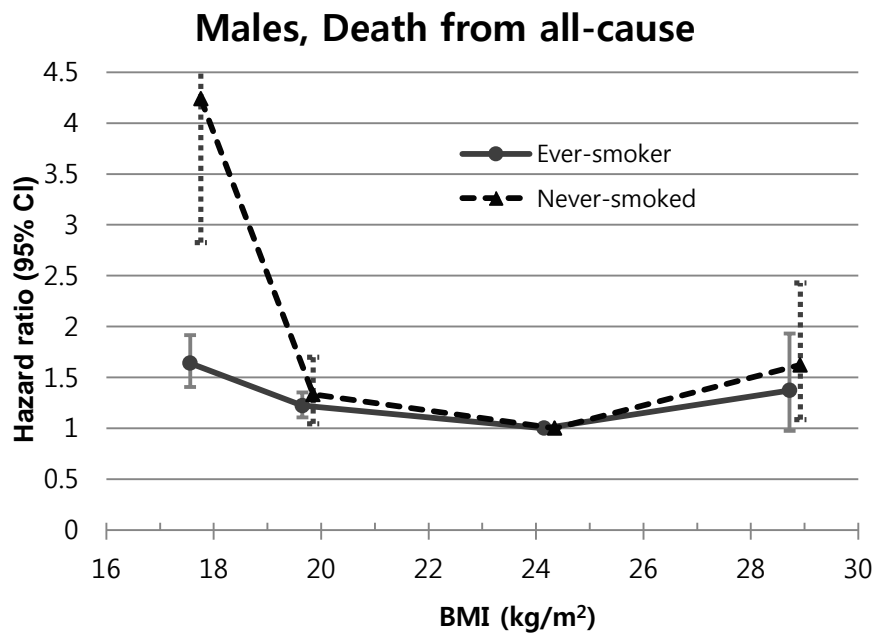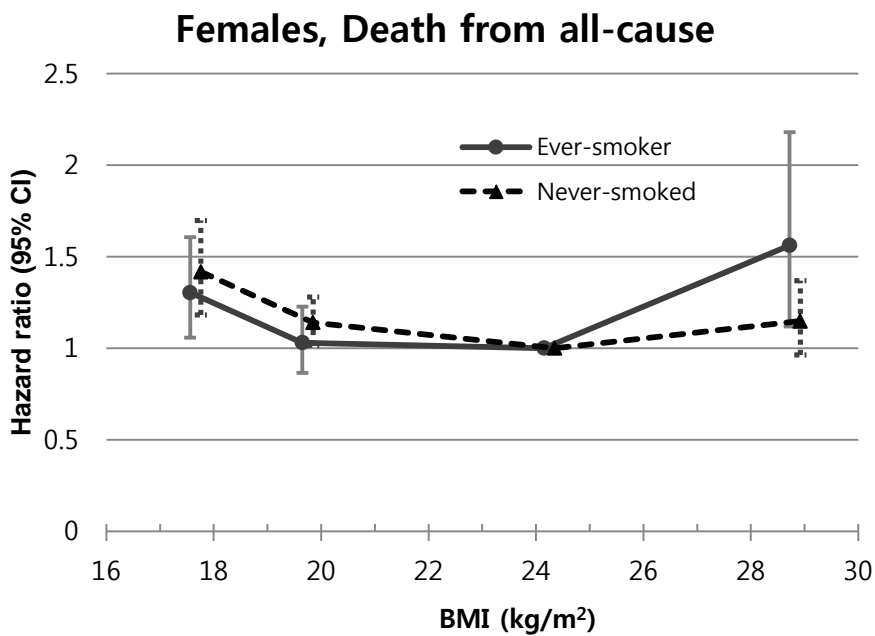

Figure C. Age-adjusted hazard ratio for all-cause mortality according to smoking status among the Korean elderly during 1985-2008 by 4 categories of body mass index (BMI) (<18.5, 18.5-20.9, 21-27.4 [Reference],  $\geq 27.5$ ). The midpoint of each BMI category was used as a representative value for each category, except for both ends of BMI categories in which the median was used as a representative.

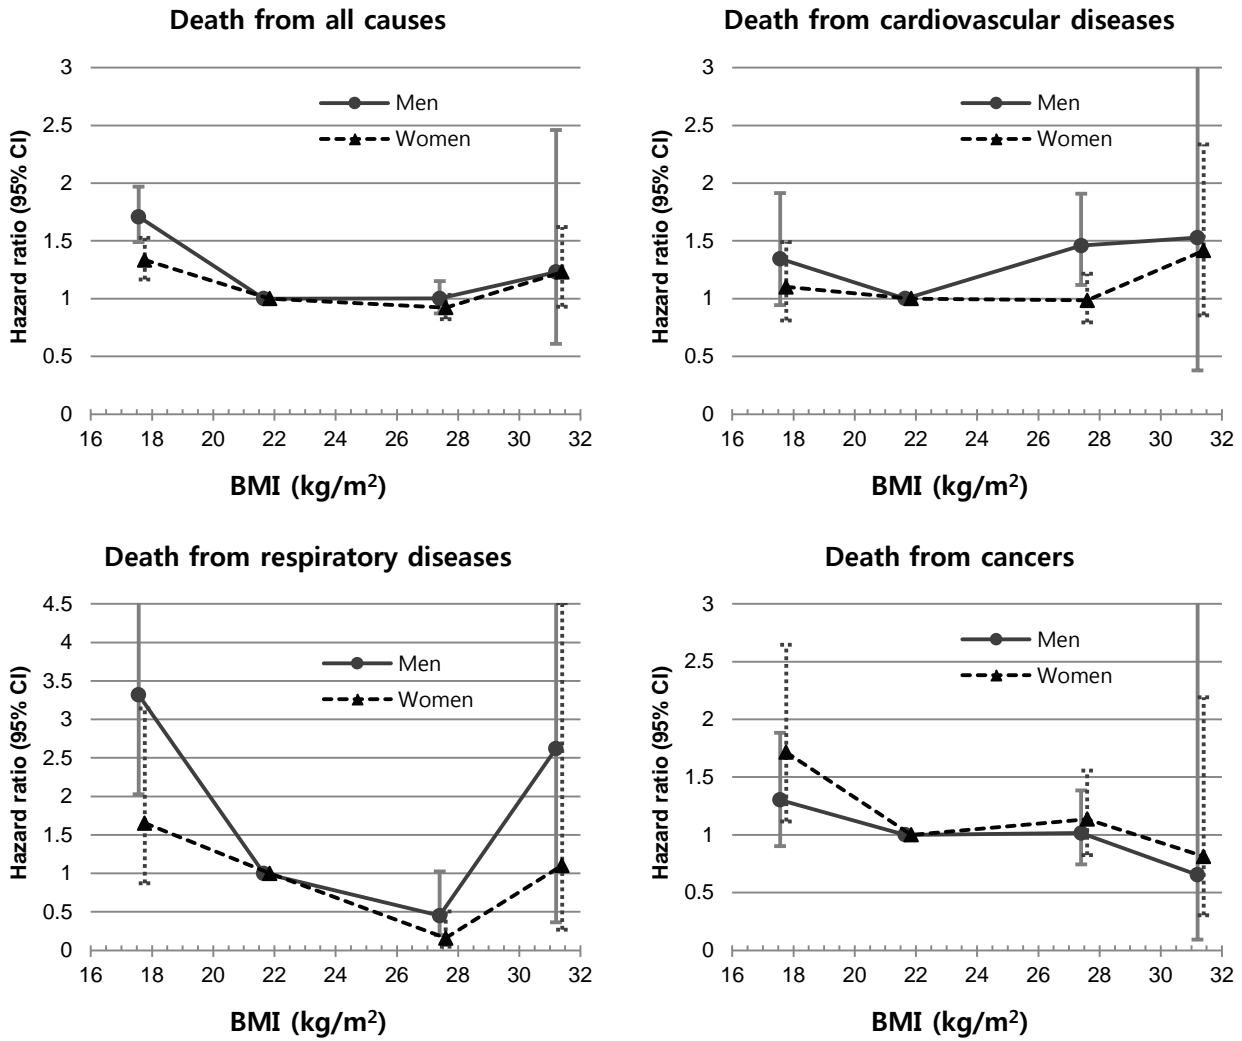

Figure D. Age-adjusted hazard ratio for mortality from various causes according to gender among the Korean elderly during 1985-2008 by 4 categories of body mass index (BMI) based on international classification by WHO (BMI: <18.5, 18.5-24.9 [Reference], 25-29.9,  $\geq 30$ ). The midpoint of each BMI category was used as a representative value for each category, except for both ends of BMI categories in which the median was used as a representative.
